# Supplementary material for: Long-Term Effects of White-Tailed Deer Exclusion on the Invasion of Exotic Plants: A Case Study in a Mid-Atlantic Temperate Forest
Source: PLoS One. 2016 Mar 28;11(3):e0151825. doi: 10.1371/journal.pone.0151825 (PMC4809546; doi:10.1371/journal.pone.0151825)
Supplement: S2 Table — (XLSX) [file pone.0151825.s002.xlsx]

## Sheet: invasive
ID	Plot	X	Y	Fence	Reference	DistForEdge	DistRoad	DistRiver	Aspect	Slope	TCI	W_SpRich	W_Stem	ROMU	BETH	RUPH	MIVI	Comfrey	pH	N	P	Canopy
1	101	1	1	0	0	35	63.8927	6.78589	21	7.8	38.7	10	32	6	8	52	4		4.59	7.03	26.28
2	102	1	2	0	0	31	47.9699	13.1359	18	5.7	52.58	6	92	14	4	49	1		4.21	6.78	29.21	89.84
3	103	1	3	0	0	29	34.5503	15.177	16	3.6	77.93	7	58	10	19	1	2		3.96	6.41	31.94	91.99
4	104	1	4	0	0	24	14.6886	6.50246	27	3.2	93.54	15	136	18	25	0	3		4.53	5.96	31.93	88.36
5	105	1	5	0	0	21	5.17317	2.88537	34	4.7	119.44	7	235	7	2	0	1		4.91	4.88	31.37
6	106	1	6	0	0	27	25.0349	11.9105	24	4.5	76.08	16	234	12	8	14	1		5.08	4.9	30.6	92.81
7	107	1	7	0	0	31	44.8969	19.6298	55	8.3	30.06	13	34	18	110	5	2	0	5.16	4.82	30.21	93.63
8	108	1	8	0	0	44	59.6895	24.9492	77	9.6	25.94	14	29	6	56	30	1	0	5.3	5.16	31	93.22
9	109	1	9	0	0	58	70.2401	28.213	48	7.5	39	10	39	2	37	33	1	0	5.42	4.62	31.21
10	110	1	10	0	0	75	81.0451	30.461	45	7.1	38.7	9	43	3	43	34	2	0	5.57	4.26	30.59
11	111	1	11	0	0	87	87.0757	37.8951	90	11.9	27.09	14	34	0	34	20	2	0	5.58	3.84	30.53
12	112	1	12	0	0	97	90.872	47.5833	84	13.7	40.71	7	21	2	43	47	2	0	5.47	4.27	31.17	90.43
13	113	1	13	0	0	110	98.6568	52.0699	89	14.9	39	13	38	8	31	21	1	0	5.32	4.34	31.78	93.63
14	114	1	14	0	0	124	103.16	39.5222	98	18.4	39.7	10	29	1	13	6	1	0	5.16	4.56	32.09	93.63
15	115	1	15	0	0	139	91.4351	33.2995	90	18.6	29.38	9	38	0	15	2	0	0	4.95	4.26	32.58
16	116	1	16	0	0	156	82.9377	30.4728	88	18.1	29.25	9	23	0	16	12	0	2	4.82	4.17	33.31	89.36
17	117	1	17	0	0	173	76.4307	28.0253	74	16	12.24	10	26	0	20	11	2	5	4.9	4.05	33.81	89.57
18	118	1	18	0	0	191	69.9238	17.0672	67	18.7	11.83	10	31	0	5	0	1	0	5.1	4.49	33.72
19	119	1	19	0	0	209	63.4168	9.34686	58	21.4	22.53	11	32	0	28	50	2	0	5.23	4.47	33.61
20	120	1	20	0	0	219	56.9098	0.311999	52	20.6	21.16	12	32	2	15	3	2	1	5.24	4.48	33.27	89.94
21	121	1	21	0	0	231	50.4029	8.72286	39	11.5	15.56	13	35	3	20	10	2	0	5.17	4.83	32.6	92.33
22	122	1	22	0	0	230	43.8959	17.7577	32	6.2	24.9	14	56	2	21	2	2	0	5.09	4.4	30.75	91.97
23	123	1	23	0	0	214	37.3889	26.3526	53	3.1	42.25	12	60	0	6	0	3	0	5.05	4.09	28.69
24	124	1	24	0	0	198	30.882	34.8556	74	3.6	66.64	8	32	0	12	1	2	0	5.02	4.95	27.33	89.16
25	125	1	25	0	0	182	23.9344	43.3586	94	4.4	149.78	12	40	0	11	2	3	2	4.96	5.38	26.28
26	126	1	26	0	0	166	15.8353	51.8617	82	3.7	47.93	9	36	3	17	3	4	0	4.95	6.38	25.44	88.63
27	127	1	27	0	0	152	9.9241	54.1175	128	6.7	19.63	9	26	1	0	0	4	0	5.06	5.97	24.82	89.67
28	128	1	28	0	0	139	4.01286	60.4549	180	9.9	39.7	10	29	0	3	6	4	0	5.18	5.59	25.1
29	129	1	29	0	0	127	1.89837	71.0952	225	13.5	29.63	12	58	0	4	12	3	0	5.36	6.02	27.46	87.98
30	130	1	30	0	0	118	7.8096	82.7316	252	17.9	15.29	19	51	0	5	0	2		5.51	6.29	30.53	92.81
31	131	1	31	0	0	112	16.8646	96.9633	253	16.9	23.37	12	49	0	5	0	1	6	5.53	8.55	33.44	93.15
32	132	1	32	0	0	109	34.9476	110.651	258	16.7	15.4	12	147	0	0	0	1	0	5.58	9.09	34.8
33	201	2	1	0	0	54	50.2713	24.989	27	6.5	15.49	8	94	5	6	18	3		4.88	6.96	21.82	88.07
34	202	2	2	0	0	51	35.8775	32.1011	58	4.5	21.61	15	93	19	11	33	2		4.72	6.97	24.06	88.48
35	203	2	3	0	0	48	19.697	33.9042	75	2.7	44.64	9	77	10	4	0	2		4.58	6.6	26.65	89.71
36	204	2	4	0	0	43	9.44732	24.1621	79	3	115.42	8	273	11	5	0	3		4.81	6.17	27.48
37	205	2	5	0	0	41	9.18406	14.7746	57	3.5	80.88	10	236	33	4	25	1		4.94	3.93	26.95	93.54
38	206	2	6	0	0	44	24.2421	6.53975	60	3.9	126.04	13	40	2	38	29	2		4.99	4.38	25.94	95.44
39	207	2	7	0	0	49	33.0166	1.17948	19	2.9	68.12	12	58	26	90	48	2	0	5.05	4.18	25.08	89.49
40	208	2	8	0	0	59	42.6926	5.29489	32	4.4	40.62	12	29	7	34	41	3	0	5.21	5.64	25.78
41	209	2	9	0	0	72	53.2604	8.33957	48	6.8	29.46	13	53	2	11	14	1	0	5.37	4.26	25.74	93.36
42	210	2	10	0	0	86	64.6263	10.8819	53	8	41.94	12	40	0	50	13	2	2	5.53	3.79	24.9	90.55
43	211	2	11	0	0	102	67.157	20.3458	40	6.1	38.22	9	32	0	68	16	2	0	5.52	2.79	25.11	89.8
44	212	2	12	0	0	114	72.0112	31.5176	56	8.7	52.75	16	39	1	44	82	2	0	5.37	4.07	26.39
45	213	2	13	0	0	125	81.028	39.2888	55	9.2	36.64	12	33	0	138	41	2	0	5.09	4.01	27.65	93
46	214	2	14	0	0	138	88.481	23.8737	67	10.5	42.2	10	22	0	9	1	1	6	4.97	5.01	28.14
47	215	2	15	0	0	152	74.9944	13.9747	83	14.3	27.95	7	28	0	11	1	1	1	4.89	4.22	28.73	93.88
48	216	2	16	0	0	167	64.3619	10.4782	86	16.5	27.08	11	34	0	5	1	1	0	4.83	4.19	29.62	93.22
49	217	2	17	0	0	183	57.5188	10.5506	74	19.2	10.32	10	46	0	5	0	1	1	4.97	3.75	30.22
50	218	2	18	0	0	200	51.0119	0.163959	67	19.2	24.46	13	40	0	7	1	0	0	5.17	4.86	29.71	88.86
51	219	2	19	0	0	218	44.5049	8.88846	49	14.9	22.57	14	38	0	5	7	1	0	5.31	4.57	29.46	87.65
52	220	2	20	0	0	236	37.9979	17.531	41	7.2	16.1	14	30	0	13	2	2	1	5.29	4.49	29.07	89.98
53	221	2	21	0	0	247	31.491	26.5658	76	5.7	24.68	12	39	0	10	0	2	0	5.09	6.08	28.69	92.47
54	222	2	22	0	0	242	24.984	35.6007	66	3	155.16	12	52	0	9	0	3	0	4.97	4.31	26.94	85.45
55	223	2	23	0	1	226	18.477	44.455	80	3.8	150.11	11	41	0	4	0	4	0	4.95	3.08	25.06
56	224	2	24	0	1	210	11.9701	52.9581	102	5.1	140.28	12	50	0	4	0	4	0	4.83	6.07	23.63
57	225	2	25	0	1	195	5.46312	61.4611	170	8.6	14.39	18	39	0	5	0	3	0	4.76	6.59	22.49
58	226	2	26	0	1	180	2.62016	69.9641	228	14.6	20.54	14	38	0	4	1	3	0	4.78	8.09	21.8
59	227	2	27	0	1	167	9.18238	73.9506	254	18.5	20.95	15	41	0	4	0	1	2	4.91	6.24	21.42
60	228	2	28	0	1	155	15.0936	78.707	259	13.9	55.09	13	61	0	0	0	1	2	5.03	5.12	21.77
61	229	2	29	0	1	145	21.0048	87.8678	241	15.9	21.17	7	54	1	3	0	2	0	5.33	5.61	24.22	92.61
62	230	2	30	0	1	137	26.9161	98.7619	246	17	9.57	12	47	1	4	1	2		5.57	5.37	27.13
63	231	2	31	0	1	132	33.0575	110.956	256	18.3	20.87	10	37	0	6	0	3	2	5.6	6.62	29.55
64	232	2	32	0	1	129	45.0524	125.174	258	17.5	21.78	7	36	0	2	2	2	0	5.61	7.14	30.91	93.09
65	301	3	1	0	0	73	37.3703	31.9508	12	3.8	34.93	11	76	3	15	45	3		4.92	6.36	18.41	88.25
66	302	3	2	0	0	71	22.0657	50.6639	70	3.5	80.97	10	40	16	26	7	1		4.7	5.59	20.08	90.92
67	303	3	3	0	0	67	7.59655	51.2096	131	7.2	139.98	13	86	6	14	18	2		4.71	5.8	23.59	93.02
68	304	3	4	0	0	63	8.07324	41.8221	252	14.8	35.26	19	99	0	0	0	4	0	4.74	6.17	24.86
69	305	3	5	0	0	61	3.95955	32.7093	210	12	18.71	9	21	0	2	0	1	0	4.78	7.85	23.83
70	306	3	6	0	0	63	7.14073	24.99	141	5.5	35.35	14	27	4	2	6	1	0	4.82	4.63	22.83
71	307	3	7	0	0	69	15.1452	18.062	161	5.4	111.65	10	30	16	23	5	2	0	4.76	4.65	21.64
72	308	3	8	0	0	76	25.712	14.3594	80	3.4	165.57	9	31	7	18	1	2	0	4.89	4.46	20.84	90.28
73	309	3	9	0	0	87	36.7866	11.5338	58	3.6	131.44	10	27	1	11	2	1	0	5.07	4.12	20.13
74	310	3	10	0	0	100	47.3526	6.79634	53	4.3	34.39	6	39	0	31	3	1	0	5.14	4.16	19.89
75	311	3	11	0	0	114	47.307	3.47623	31	5.1	36.63	9	29	0	30	9	1	0	5.09	4.07	20.61	95.29
76	312	3	12	0	0	130	53.9532	14.8761	29	4.9	37.96	11	35	1	19	44	3	0	4.94	4.64	22.41
77	313	3	13	0	0	141	63.323	22.5385	31	5.4	35.6	14	44	1	18	6	3	0	4.67	3.26	24.34
78	314	3	14	0	0	153	72.4532	11.6102	35	6.2	25.23	9	46	0	2	2	1	0	4.63	3.81	25.23	94.43
79	315	3	15	0	0	166	60.2095	3.83792	30	6	33.77	10	48	0	11	1	1	3	4.9	4.03	26.35	96.1
80	316	3	16	0	0	180	46.9708	0.825519	29	6.5	29.82	12	40	0	4	15	1	0	5.06	4.65	27.89
81	317	3	17	0	0	195	38.6069	9.09487	27	6.6	10.32	8	30	0	4	0	1	0	5.04	4.28	28.11	93.22
82	318	3	18	0	0	211	32.1	15.4167	27	4.1	26.3	11	25	2	8	5	2	0	5.12	3.94	27.46	92.65
83	319	3	19	0	0	228	25.593	27.4855	22	1.9	53.34	15	44	0	6	0	2	0	5.24	3.79	26.85
84	320	3	20	0	0	245	19.0861	35.3739	61	3.6	121.85	10	37	0	1	0	2	0	5.35	3.92	25.75	92.47
85	321	3	21	0	0	262	12.5791	44.4088	118	6.1	240.03	11	40	0	6	0	3	0	5.36	4.03	24.38
86	322	3	22	0	0	254	6.07212	53.4436	180	10.6	20.67	15	53	0	3	0	2	0	5.02	3.95	23.41	91.46
87	323	3	23	0	1	238	0.43484	62.4785	222	13.2	27.25	16	69	0	0	1	1	0	4.86	5.59	22.32	91.91
88	324	3	24	0	1	223	6.9418	71.0605	250	14.4	20.31	9	51	0	3	0	1	0	4.81	4.31	20.73	90.93
89	325	3	25	0	1	208	13.4488	79.5635	252	15.8	15.66	8	32	0	4	1	1	14	4.78	4.09	19.39
90	326	3	26	0	1	195	20.7671	88.0666	247	16.8	15.87	9	29	0	6	6	1	12	4.78	3.79	18.59
91	327	3	27	0	1	183	28.2889	93.8547	259	14.1	18.52	11	31	0	3	0	1	1	4.86	4.83	19.11	90.68
92	328	3	28	0	1	172	34.2001	97.6462	260	11.3	45.56	7	29	0	5	14	2	0	5.01	5.87	20.55	91.19
93	329	3	29	0	1	163	40.1113	105.171	230	14.9	17.98	10	39	0	5	7	3	3	5.28	6.54	22.28
94	330	3	30	0	1	156	46.0225	115.534	235	16.2	14.72	9	38	1	2	6	2	2	5.5	7.63	24.37	91.03
95	331	3	31	0	1	151	51.9338	126.573	249	17.5	20.86	6	24	1	2	0	1	0	5.6	6.95	26.7
96	332	3	32	0	1	149	60.3167	139.205	262	17.1	15.34	8	33	1	5	1	2	0	5.6	7.28	28.02	93.02
97	401	4	1	0	0	93	24.4951	42.3216	65	3.5	130.05	9	120	8	33	14	3		5.05	6.26	16.78	88.38
98	402	4	2	0	0	91	9.19054	59.3344	141	7.7	125.16	12	32	6	20	3	2		4.88	5.01	18.33
99	403	4	3	0	0	87	6.11401	68.8696	223	16.7	33.24	14	78	0	0	0	1		4.82	5.19	21.17
100	404	4	4	1	0	83	20.6844	59.4821	253	11	15.38	14	73	5	0	7	0	0	4.72	5.52	22.02	93.27
101	405	4	5	1	0	81	19.2511	51.1596	295	15	14.98	13	52	0	0	0	0	0	4.77	4.36	21.22
102	406	4	6	0	0	83	11.5077	43.4403	305	15.4	25.42	8	39	0	1	2	1	0	4.68	4.26	20.19
103	407	4	7	0	0	88	1.83547	37.7163	197	9	27.07	10	37	0	2	0	1	0	4.54	4.46	18.91
104	408	4	8	0	0	94	8.94802	34.0136	121	4.3	33.41	10	21	2	10	8	1	0	4.74	4.15	17.65	90.27
105	409	4	9	0	0	103	21.4452	31.4072	118	4	61.6	15	64	3	13	17	2	0	5.11	3.85	16.73	91.65
106	410	4	10	0	0	115	27.728	24.3456	88	3	107.47	12	187	0	18	8	1	1	5.18	4.1	16.59	94.82
107	411	4	11	0	0	128	27.6738	12.3959	91	3.8	132.99	9	57	0	25	3	2	0	4.95	4.05	17.42	89.25
108	412	4	12	0	0	143	36.3245	2.64752	95	4.4	140.08	11	58	3	3	0	2	0	4.73	4.61	19.07	93.22
109	413	4	13	0	0	158	45.5286	4.72596	31	2.8	53.99	13	40	0	16	4	3	0	4.59	4.01	20.7	93.09
110	414	4	14	0	0	169	54.6589	5.14007	8	2	21.61	8	37	0	1	0	3	0	4.61	3.74	22.06	91.99
111	415	4	15	0	0	181	46.0813	16.0684	11	2.9	42.98	13	47	4	17	1	2	0	4.93	3.91	23.59
112	416	4	16	0	0	194	31.9381	3.26708	12	2.8	34.12	9	41	0	27	12	2	0	5.2	4.14	25.15	93.36
113	417	4	17	0	0	209	19.7065	23.1175	23	2.5	53.76	9	30	1	17	0	2	0	5.2	3.88	25.88
114	418	4	18	0	0	224	13.1881	32.968	99	6.1	202.51	12	41	0	3	0	3	0	5.21	3.77	25.92	92.61
115	419	4	19	0	0	239	6.68113	43.6059	145	7.6	145.11	11	28	0	7	3	3	0	5.18	3.13	25.39	93.71
116	420	4	20	0	0	256	0.174169	53.4412	180	9.3	52.41	13	39	0	0	6	2	2	5.21	3.4	23.94	89.23
117	421	4	21	0	0	272	6.3328	62.2517	235	14.4	23.24	14	43	0	3	0	2	0	5.21	2.51	22.12	92.33
118	422	4	22	0	0	266	12.8398	71.2866	252	16.3	10.59	15	47	0	2	0	0	0	4.91	3.38	20.84	92.61
119	423	4	23	0	1	251	19.3467	80.3215	262	16.3	21.57	8	38	0	2	1	1	0	4.75	3.41	19.71	91.99
120	424	4	24	0	1	237	25.8537	89.1629	258	14.8	19.07	10	38	1	3	2	1	2	4.81	3.73	18.53	90.35
121	425	4	25	0	1	223	32.3607	97.666	246	14.7	19.65	10	35	1	1	1	1	13	4.72	3.72	17.43	89.92
122	426	4	26	0	1	211	38.9446	106.169	247	14.8	12.11	11	40	0	3	2	1	1	4.66	3.57	16.82	88.7
123	427	4	27	0	1	199	47.3217	113.792	273	13	33.89	9	30	0	2	0	1	9	4.72	4.59	17.64	91.69
124	428	4	28	0	1	190	53.3066	116.939	269	11.1	36.26	6	18	0	3	9	1	1	4.98	5.73	19.31	91.67
125	429	4	29	0	1	181	59.2178	123.292	219	13.4	25.16	9	21	0	10	13	4	1	5.31	6.52	20.73	92.67
126	430	4	30	0	1	175	65.129	132.389	218	14.4	24.49	11	23	0	0	3	2	5	5.54	7.87	22.27
127	431	4	31	0	1	171	71.0403	143.201	233	13.8	26.86	9	31	0	1	5	1	0	5.63	6.76	24.24	93.22
128	432	4	32	0	1	169	77.7592	154.556	251	12.9	14.08	7	28	0	2	11	2	0	5.62	7.07	25.39
129	501	5	1	0	0	113	11.5858	55.552	176	9	69.75	14	85	3	13	8	2		5.29	7.12	16.25	79.11
130	502	5	2	0	0	111	3.68465	70.1642	226	15.9	34.75	16	36	12	20	20	1		5.2	8.27	17.55	91.72
131	503	5	3	0	0	106	18.9892	86.5295	210	10.9	23.08	15	41	0	0	5	1	0	4.87	5.95	18.28
132	504	5	4	1	0	103	34.2938	77.3445	202	8.5	12.2	14	71	1	0	0	0	0	4.69	5.25	18.54	93.5
133	505	5	5	1	0	101	37.3836	69.6099	288	10.5	11.41	13	56	1	2	0	0	0	4.57	4.85	18.19	92.29
134	506	5	6	1	0	102	29.3829	61.9454	310	15.8	29.11	14	49	0	0	0	1	0	4.53	4.5	17.83
135	507	5	7	1	0	108	18.8161	57.3706	306	15.9	32.27	12	57	1	5	0	0	0	4.47	3.47	17
136	508	5	8	0	0	113	6.70576	53.668	235	12.9	35.12	13	40	1	3	1	0	0	4.7	3.39	15.79
137	509	5	9	0	0	121	4.14273	51.2806	119	5.1	42.55	15	53	0	0	0	1	0	5.42	3.5	14.99
138	510	5	10	0	0	131	8.66172	40.4352	81	3.1	45.66	13	38	1	10	23	1	0	5.67	4.03	14.67	85.87
139	511	5	11	0	0	143	9.24973	29.8108	71	2.5	31.91	11	26	2	22	3	2	1	5.15	3.7	15.33
140	512	5	12	0	0	157	18.6041	20.674	110	3.7	41.55	13	33	0	13	0	1	0	4.77	2.92	16.57	93.43
141	513	5	13	0	0	171	27.7343	14.837	120	4.2	112.44	10	54	0	3	0	3	0	4.74	3.45	17.64	93.43
142	514	5	14	0	0	186	36.8645	21.9721	92	3.7	198.61	8	33	0	0	0	2	0	4.91	3.76	18.95	93.24
143	515	5	15	0	0	197	34.3733	14.1855	46	2.4	72.53	7	30	1	7	0	4	0	5.02	4	20.69	92.46
144	516	5	16	0	0	209	18.1035	5.70864	80	3	280.84	13	42	1	5	1	3	0	5.13	4.65	22.67
145	517	5	17	0	0	223	3.6666	25.559	183	10.6	156.71	11	31	0	3	3	2		5.36	4.32	24.39
146	518	5	18	0	0	237	5.72379	45.4095	241	13.6	11.95	13	35	1	1	1	1	1	5.35	4.25	24.94
147	519	5	19	0	0	252	12.2308	59.6654	223	11.8	24.45	13	51	0	2	2	1	1	5.11	3.58	24.58	89.21
148	520	5	20	0	0	267	18.7377	71.7952	234	14.4	19.92	12	40	0	2	1	1	1	4.9	3.54	23.18	92.19
149	521	5	21	0	0	283	25.2447	80.0947	242	16.8	27.35	16	39	0	0	1	0	0	4.66	2.96	21.38	91.37
150	522	5	22	0	0	279	31.7516	89.1296	247	15.5	13.38	11	35	0	1	0	1	9	4.74	3.72	19.44	88.51
151	523	5	23	0	1	265	38.2586	98.1644	259	14.6	22.64	12	28	0	1	1	2	11	4.82	3.91	17.88	92.06
152	524	5	24	0	1	251	44.7656	107.199	265	15.1	13.22	11	23	0	6	2	1	7	4.88	3.39	17.15	88.15
153	525	5	25	0	1	239	51.2725	115.768	244	13.8	17.12	12	23	0	3	4	0	8	4.72	3.92	16.48
154	526	5	26	0	1	227	57.7795	124.271	240	11.9	16.26	9	24	1	3	2	1	10	4.5	2.83	16.21	90.46
155	527	5	27	0	1	217	65.4686	132.774	276	12.1	30.82	11	29	0	4	0	1	25	4.54	4.23	16.91	92.09
156	528	5	28	0	1	208	72.413	136.436	277	11.4	47.56	9	20	0	2	1	2	14	4.92	5.16	18.29	90.03
157	529	5	29	0	1	200	78.3243	141.919	221	12.3	32.42	7	25	0	5	7	3	10	5.43	5.21	19.6
158	530	5	30	0	1	195	84.2355	149.89	212	14	33.68	9	21	0	4	5	2	2	5.75	4.95	20.68	93.29
159	531	5	31	0	1	191	90.1467	159.974	220	12.3	19.11	7	32	0	6	14	3	3	5.73	5.92	22.08
160	532	5	32	0	1	189	96.2023	170.871	242	12.4	16.88	8	26	0	9	10	3	2	5.64	6.37	22.98	89.49
161	601	6	1	0	0	133	1.36582	71.3574	214	14.2	55.46	11	33	7	20	8	2		5.11	6.54	15.31	93.15
162	602	6	2	0	0	131	16.6058	83.773	231	14.8	23.32	13	27	0	0	0	1		4.9	7.22	16
163	603	6	3	1	0	126	31.8644	98.2594	210	10.3	16.39	13	68	0	0	1	2	0	4.66	7.82	16.24	89.88
164	604	6	4	1	0	123	47.169	95.7794	238	10.3	11.58	13	55	0	15	0	0	0	4.65	4.84	16.52	89.65
165	605	6	5	1	0	121	56.032	88.0602	280	11.5	13.38	10	89	1	2	0	0	0	4.69	4.51	16.78	91.9
166	606	6	6	1	0	122	46.3636	81.0014	305	13.6	27.1	13	49	0	0	0	1	0	4.72	4.64	16.69	90.34
167	607	6	7	1	0	127	34.8567	77.0248	314	13.6	27.82	13	38	0	0	1	0	0	4.67	4.01	15.82	93.43
168	608	6	8	1	0	132	22.7763	73.419	310	14.4	31.23	10	45	1	4	0	0	0	4.76	3.76	14.84	93.43
169	609	6	9	1	0	139	13.6575	68.4766	301	14	44.77	13	74	0	2	0	1	0	5.14	3.65	14.17
170	610	6	10	0	0	148	10.3762	56.974	194	8	27.72	12	69	0	1	0	0	0	5.37	3.98	13.74	93.09
171	611	6	11	0	0	159	8.37901	47.3344	133	5.1	24.33	14	66	0	0	0	1	0	5.06	3.76	13.67	91.54
172	612	6	12	0	0	172	0.809707	39.5958	130	4.4	24.48	8	19	0	1	0	1	0	4.69	3.17	13.81	86.04
173	613	6	13	0	0	185	9.93993	34.8318	140	4.8	19.51	11	28	21	0	0	2	0	4.73	3.38	14.6	92.06
174	614	6	14	0	0	199	18.8302	33.049	126	4.5	26.99	13	28	0	0	0	3	1	5.02	3.62	16.11	93.22
175	615	6	15	0	0	213	21.8105	13.0796	106	4.5	92.63	13	39	0	3	9	2	0	5.17	3.44	18.34
176	616	6	16	0	0	225	6.47201	6.88978	137	7.1	185.93	12	42	1	1	3	3	0	5.22	3.26	20.7
177	617	6	17	0	0	237	9.79789	26.8592	222	14.6	24.56	14	53	0	0	2	1	0	5.18	3.72	22.31
178	618	6	18	0	0	251	24.6049	46.8286	251	14.7	28.2	12	37	0	0	1	1	1	5.05	3.75	22.99	91.75
179	619	6	19	0	0	265	31.1426	66.798	267	16.8	18.52	10	39	0	0	2	0	7	4.89	3.5	22.9	90.18
180	620	6	20	0	0	280	37.6496	86.7674	253	16	14.06	11	32	0	0	0	0	4	4.82	3.51	22.21	92.67
181	621	6	21	0	0	295	44.1566	98.0713	228	13.3	20.59	10	28	0	3	1	0	6	4.84	3.4	20.98	92.06
182	622	6	22	0	0	293	50.6635	106.973	232	12.5	25.86	10	43	0	4	0	1	13	5.03	3.64	19.24	89.24
183	623	6	23	0	1	280	57.1705	116.007	241	12.7	26.17	10	36	0	0	0	1	6	5.18	3.61	17.76	92.4
184	624	6	24	0	1	267	63.6775	125.042	252	13.2	23.61	8	24	0	7	1	2	6	5.15	3.1	17.05	88.22
185	625	6	25	0	1	255	70.1844	133.871	252	13.7	18.92	9	19	0	3	3	2	31	4.98	3.92	16.62
186	626	6	26	0	1	244	76.6914	142.374	235	11.7	22.56	4	21	0	1	1	2	14	4.82	3.62	16.56	88.49
187	627	6	27	0	1	234	83.6158	150.877	268	12.5	14.8	6	28	0	3	3	1	20	4.73	4.29	17.11	89.58
188	628	6	28	0	1	226	91.5195	156.06	273	12.8	37.42	8	18	0	1	0	0	6	4.89	4.83	18.23	88.49
189	629	6	29	0	1	219	97.4307	160.875	222	11.2	40.8	7	20	0	6	18	1	5	5.37	5.15	19.3
190	630	6	30	0	1	214	103.342	167.949	212	14.8	20.6	8	17	0	7	11	2	9	5.69	5.26	20.04	87.98
191	631	6	31	0	1	211	109.253	177.011	217	13.9	25.61	7	19	0	0	35	2	2	5.58	6.21	20.71	92.33
192	632	6	32	0	1	209	115.164	187.64	230	12.8	22.1	8	21	0	2	14	3	2	5.45	6.69	21.29	88.78
193	701	7	1	0	0	153	14.377	86.1965	220	15.1	33.49	11	37	8	28	16	2		4.83	5.85	14.38	93.22
194	702	7	2	0	0	150	29.5574	99.398	231	12.8	22.07	15	53	0	0	0	1		4.55	5.07	14.88
195	703	7	3	1	0	145	44.7973	112.026	231	11.4	21.84	15	81	0	0	0	1	0	4.58	5.48	15.44	89.59
196	704	7	4	1	0	143	60.0441	114.23	254	12.7	0	11	83	5	5	1	0	0	4.86	4.98	16.03	93.22
197	705	7	5	1	0	141	73.911	106.51	293	14.2	16.41	12	153	0	1	1	0	0	5.23	6.46	16.91	93.5
198	706	7	6	1	0	142	63.0584	100.425	318	13.8	23.18	7	134	1	1	0	1	0	5.21	5.17	16.29	88.35
199	707	7	7	1	0	146	49.9405	96.6791	316	12.6	26.49	10	58	0	1	0	0	0	5.08	4.3	14.97	88.5
200	708	7	8	1	0	151	40.5765	93.2742	309	12.1	27.63	10	36	0	0	0	0	0	4.92	3.84	14.05
201	709	7	9	1	0	157	32.2959	84.495	283	11.2	35.33	7	63	0	0	0	1	0	4.78	3.07	13.49	92.08
202	710	7	10	1	0	165	30.1649	74.4977	233	9.1	24.07	8	46	0	4	0	0	0	4.97	4.32	13.11
203	711	7	11	1	0	175	26.1149	65.1756	199	8.3	26.87	12	53	0	0	0	1	0	4.84	4.16	12.45	93.02
204	712	7	12	1	0	187	16.9846	58.5175	225	9.2	43.87	11	45	0	0	0	0	0	4.49	2.39	11.57
205	713	7	13	0	0	200	7.85442	52.3511	226	8.3	11.81	13	36	0	1	0	3	0	4.56	3.09	12.36
206	714	7	14	0	0	213	0.103214	32.3525	173	6.1	26.81	12	29	0	0	0	2	0	4.96	3.67	14.08
207	715	7	15	0	0	227	3.1115	12.3538	98	4.1	28.18	15	30	1	13	6	2	1	5.12	3.14	16.78	88.61
208	716	7	16	0	0	241	5.15943	7.64482	122	6.8	88.48	12	35	0	0	0	2	0	5.09	2.53	19.33	92.21
209	717	7	17	0	0	253	21.4293	27.6434	176	13.3	20.37	13	76	0	0	1	1	0	4.76	3.32	20.6
210	718	7	18	0	0	266	37.6992	47.6421	202	11	24.7	11	40	0	0	0	0	0	4.52	3.38	21.18
211	719	7	19	0	0	279	50.0545	67.6407	238	11.9	29.5	8	29	0	1	0	1	2	4.55	2.95	21.32	88.22
212	720	7	20	0	0	293	56.5615	87.6393	257	14.5	13.1	12	41	0	0	0	1	0	4.78	3.21	21.41	92.54
213	721	7	21	0	0	308	63.0685	107.638	244	12.8	18	9	30	0	1	0	0	37	5.13	2.63	21.12	92.33
214	722	7	22	0	0	308	69.5754	124.815	205	9.4	29.32	9	29	0	3	1	1	66	5.32	3.19	19.75	89.41
215	723	7	23	0	1	295	76.0824	133.85	227	11.6	28.37	8	23	0	3	0	1	13	5.54	2.48	18.43	92.33
216	724	7	24	0	1	283	82.5893	142.885	229	11.6	23.83	6	24	0	1	1	2	38	5.43	3.27	17.59	85.94
217	725	7	25	0	1	272	89.0963	151.92	250	13	16.46	8	16	0	2	1	2	15	5.33	4.53	17.32
218	726	7	26	0	1	261	95.6033	160.476	257	14.2	20.26	8	21	0	2	1	2	19	5.33	3.14	17.41	86.44
219	727	7	27	0	1	252	102.127	168.979	277	14.5	16.27	6	19	0	2	1	2	26	5.07	3.93	17.8	89.8
220	728	7	28	0	1	245	110.17	175.769	287	15.3	31.23	11	24	0	0	2	2	43	4.92	3.72	18.65	88.82
221	729	7	29	0	1	238	116.537	180.058	246	13.2	51.32	8	20	0	3	6	3	9	5.35	5.41	19.44	93.02
222	730	7	30	0	1	234	122.448	186.405	215	13.5	19.2	9	22	0	4	15	4	6	5.63	5.88	19.93
223	731	7	31	0	1	231	128.36	194.61	212	13.5	27.39	6	12	0	8	9	4	7	5.37	7.79	19.98
224	732	7	32	0	1	229	134.271	204.448	220	12	31.86	7	17	2	13	1	2	3	5.21	8.29	20.18	90.41
225	801	8	1	0	0	172	31.8973	100.977	208	13.3	24.54	14	24	0	0	0	1		4.83	5.72	13.91
226	802	8	2	0	0	169	42.6608	114.481	205	11.1	28.89	17	82	2	19	11	1	0	4.66	4.82	14.48
227	803	8	3	1	0	165	57.7489	127.439	179	8.2	24.98	12	62	0	0	0	1	0	4.82	4.21	15.07	90.4
228	804	8	4	1	0	162	72.9889	132.68	202	8.7	23.46	14	91	1	2	3	0	0	5.22	4.99	15.7	93.15
229	805	8	5	1	0	161	88.2288	125.174	268	10.9	11.86	11	87	0	0	0	0	0	5.54	4.74	15.96
230	806	8	6	1	0	162	77.8163	120.036	314	13.7	25.38	13	119	3	0	0	1	0	5.49	4.61	15.14	93.22
231	807	8	7	1	0	165	67.4955	116.333	316	13.1	27.67	15	105	0	11	0	0	0	5.34	4.6	13.88	90.26
232	808	8	8	1	0	171	58.3767	112.396	319	14.9	30.36	13	73	0	3	0	0	0	5.3	4.21	12.95	90.77
233	809	8	9	1	0	176	51.9255	101.661	307	12.9	32.74	9	63	0	0	0	1	0	5.14	4.04	12.34	90.82
234	810	8	10	1	0	183	50.1217	92.0213	234	9.8	40.58	7	52	0	1	0	0	0	4.9	4.35	12.03	89.21
235	811	8	11	1	0	192	43.9092	83.9175	243	11.2	22.91	11	45	0	0	0	1	0	4.67	4.11	11.59	88.15
236	812	8	12	1	0	203	34.779	72.1159	238	11.1	52.96	11	45	0	8	0	0	0	4.45	2.89	11.18	89.96
237	813	8	13	1	0	215	25.6897	52.1172	274	10.1	21.09	14	41	0	4	2	1	0	4.55	3.12	11.72
238	814	8	14	0	0	228	18.7422	32.1186	221	7.5	47.31	12	54	0	0	0	1	0	4.87	3.43	13.4
239	815	8	15	0	0	241	15.6924	12.12	118	4.8	36.47	17	59	1	11	2	1	1	4.82	3.46	16.35	91.13
240	816	8	16	0	0	256	22.6831	7.87865	108	5.1	41.95	10	40	1	3	1	1	0	4.61	3.51	19.25	90.29
241	817	8	17	0	0	269	33.3114	27.8773	147	11.7	33.22	14	56	0	1	2	1	1	4.42	3.02	20.65	89.31
242	818	8	18	0	0	281	49.3307	47.8759	172	14.1	12.28	8	37	0	3	0	1	0	4.23	3.01	20.98	89.84
243	819	8	19	0	0	294	65.6006	67.8745	160	9.4	11.91	11	38	0	1	0	0	0	4.2	3.28	20.76	89.56
244	820	8	20	0	0	307	75.4734	87.8732	203	9.4	24.61	13	29	0	3	0	1	0	4.42	3.37	21.24	92.19
245	821	8	21	0	0	322	81.9803	107.872	244	11.6	12.17	11	35	0	0	1	1	5	4.64	3.36	21.43	91.72
246	822	8	22	0	0	323	88.4873	127.87	228	11.3	23.02	7	26	0	4	5	1	4	5.01	3.3	20.23	89.53
247	823	8	23	0	1	311	94.9943	147.869	227	11.8	27.59	6	17	0	1	0	1	25	5.42	3.09	18.92	92.13
248	824	8	24	0	1	299	101.501	160.728	214	10	14.13	8	22	0	5	0	1	29	5.62	3.68	18.18	87.16
249	825	8	25	0	1	289	108.008	169.763	230	11.1	16.45	9	28	0	2	4	1	13	5.6	4.06	17.91
250	826	8	26	0	1	279	114.515	178.579	227	11.4	22.22	5	23	0	8	1	1	37	5.41	3.81	18.04	86.42
251	827	8	27	0	1	271	121.022	187.082	252	11.6	15.6	9	23	0	4	0	2	39	5.25	3.97	18.26	87.94
252	828	8	28	0	1	263	128.317	195.537	283	14.7	16.67	7	18	0	2	1	2	45	5.27	4.51	18.61	89.59
253	829	8	29	0	1	258	135.644	199.401	266	13.3	31.16	10	25	0	1	0	1	5	5.57	4.86	19.28
254	830	8	30	0	1	253	141.555	205.151	226	12.8	30.97	6	22	0	0	1	4	31	5.73	4.95	19.71
255	831	8	31	0	1	251	147.466	212.634	213	14.4	27.21	5	17	0	7	7	4	18	5.55	5.76	19.56	93.22
256	832	8	32	0	1	249	153.377	221.673	221	12	28.06	8	14	0	2	11	1	1	5.34	6.45	19.5	87.74
257	901	9	1	0	0	192	51.2657	117.276	224	11.7	31.77	11	80	0	0	0	1		4.84	5.47	13.65
258	902	9	2	1	0	188	58.572	129.122	174	9.1	30.25	14	117	0	6	0	1	0	4.87	4.28	14.31	88.59
259	903	9	3	1	0	185	70.945	142.765	148	7.1	26.43	14	54	0	0	0	1	0	5.05	5.17	14.87	90.15
260	904	9	4	1	0	182	85.9405	151.13	139	6.2	21.61	13	166	0	0	0	0	0	5.4	5.74	15.12	93.63
261	905	9	5	1	0	181	101.18	144.197	276	10.3	21.35	9	138	0	0	0	0	0	5.79	4.01	14.76
262	906	9	6	1	0	182	94.522	139.69	313	13.2	28.13	12	67	0	4	0	1	0	5.78	4.57	13.78	93.22
263	907	9	7	1	0	185	85.2957	135.988	318	13	29.34	9	113	2	1	0	0	0	5.62	7.03	12.7	87.24
264	908	9	8	1	0	190	76.5699	128.964	315	13.8	29.1	9	86	1	0	1	0	0	5.65	4.6	11.82	88.43
265	909	9	9	1	0	195	71.7418	119.185	298	14.5	32.98	8	46	0	0	0	1	0	5.48	4.49	11.32	89.34
266	910	9	10	1	0	202	70.1031	106.041	282	14.9	21.56	11	43	0	0	0	0	0	4.95	5.09	11.32	87.83
267	911	9	11	1	0	210	61.7036	86.8507	258	12.7	33.59	11	41	0	0	0	1	0	4.59	4.76	11.31	88.44
268	912	9	12	1	0	220	52.5733	67.6606	301	11.7	40.5	12	39	0	2	0	1	0	4.39	2.22	11.26
269	913	9	13	1	0	231	44.3722	48.4705	316	11.7	41.27	11	30	0	13	0	1	1	4.52	2.79	11.73
270	914	9	14	0	0	243	38.1205	29.2804	244	8.5	47.81	9	52	0	0	0	1	1	4.79	3.13	13.33
271	915	9	15	0	0	256	35.4246	10.0903	152	5.5	36.02	9	37	5	10	27	3	0	4.54	3.54	16.59	89.48
272	916	9	16	0	0	270	41.3821	9.09982	101	4.3	39.97	11	35	0	8	0	4	0	4.23	3.94	19.79	90.88
273	917	9	17	0	0	284	49.1065	28.4745	126	8.8	139.88	14	47	0	5	0	3	2	4.17	2.98	21.07	89.56
274	918	9	18	0	0	297	61.5822	48.3016	169	13.5	27.14	12	44	0	2	0	1	1	4.08	2.92	21.24	91.7
275	919	9	19	0	0	309	77.232	68.2297	161	12.4	14.5	10	40	0	0	0	1	3	4.06	3.17	21.05	86.26
276	920	9	20	0	0	322	93.5019	88.1904	188	11	24.1	12	48	0	4	0	2	10	4.11	3.31	21.54	92.47
277	921	9	21	0	0	336	100.892	108.166	182	8.8	25.98	11	33	1	1	0	0	9	4.19	3.43	21.88	92.26
278	922	9	22	0	0	339	107.399	128.148	217	10.5	12.8	10	46	1	1	2	1	15	4.64	3.11	20.61	92.19
279	923	9	23	0	1	327	113.906	148.136	191	9.6	31.23	11	90	0	4	0	1	11	5.15	2.5	19.25	91.85
280	924	9	24	0	1	316	120.413	168.127	206	9.9	26.88	9	36	1	6	4	2	15	5.56	3.59	18.54	88.22
281	925	9	25	0	1	306	126.92	187.606	193	8.9	13.96	9	25	2	8	1	2	65	5.59	3.95	18.14
282	926	9	26	0	1	297	133.427	196.641	190	8.9	17.47	6	36	0	3	1	1	45	5.36	3.4	18.16
283	927	9	27	0	1	289	139.934	205.184	210	10.3	9.44	9	25	0	1	4	2	76	5.37	3.43	18.25
284	928	9	28	0	1	282	146.645	213.687	269	12.9	16.24	8	25	0	2	2	1	25	5.53	4.6	18.26	88.85
285	929	9	29	0	1	277	154.75	218.863	253	13	27.16	7	22	0	2	1	2	12	5.77	4.73	18.98	93.5
286	930	9	30	0	1	273	160.661	224.114	250	13.7	40.59	8	23	0	3	5	3	30	5.83	3.74	19.48	93.15
287	931	9	31	0	1	270	166.573	230.983	210	13.4	30.46	3	13	2	2	7	4	48	5.67	5.41	19.26
288	932	9	32	0	1	269	172.484	239.331	217	12.2	14.62	6	13	0	0	16	3	22	5.48	6.98	19.07	88.52
289	1001	10	1	0	0	212	70.9853	130.114	219	10.6	30.17	11	257	2	0	0	1	0	4.83	5.78	13.37
290	1002	10	2	1	0	208	76.4292	145.017	194	8.8	27.06	16	323	2	5	0	1	0	4.86	5.24	13.99
291	1003	10	3	1	0	205	86.2782	157.318	150	7	21.74	11	213	2	1	0	1	0	5.22	5.35	14.47	94.57
292	1004	10	4	1	0	202	99.2292	169.635	114	5.4	12.6	15	134	1	0	0	0	0	5.58	5.19	14.36
293	1005	10	5	1	0	201	114.132	163.452	243	8.7	28.74	15	178	0	1	1	0	0	5.91	5.4	13.64
294	1006	10	6	1	0	202	112.215	159.345	314	12.9	25.95	7	150	0	1	0	1	0	6.01	4.58	12.58
295	1007	10	7	1	0	204	103.096	154.256	311	12.8	31.81	9	111	0	0	0	0	0	5.91	3.88	11.62	90.67
296	1008	10	8	1	0	209	95.4787	135.148	302	13.7	29.82	11	72	0	0	0	0	0	5.84	3.94	10.91	91.46
297	1009	10	9	1	0	214	91.5682	116.318	290	13.8	40.07	7	42	0	1	0	1	0	5.64	3.85	10.61	91.57
298	1010	10	10	1	0	220	88.6282	97.9457	290	13.8	44.15	11	32	0	0	0	0	0	5.19	3.68	11.08
299	1011	10	11	1	0	228	79.4979	79.8027	281	10.3	28.1	12	30	1	0	0	1	0	4.83	3.43	11.47	88.33
300	1012	10	12	1	0	237	70.3938	61.6598	301	10.5	29.17	12	46	0	2	0	1	0	4.51	2.46	11.62	88.12
301	1013	10	13	0	0	247	63.0991	42.8367	309	10.3	35.4	11	33	0	0	0	1	0	4.42	2.88	12.38	89.62
302	1014	10	14	0	0	259	57.4987	23.6466	301	10.3	36.11	12	51	1	6	1	2	2	4.47	3.07	14.15	88.73
303	1015	10	15	0	0	271	55.3494	4.45645	181	6.3	36.55	13	45	0	20	3	2	2	4.38	3.14	17.16
304	1016	10	16	0	0	284	60.0811	14.7337	100	4.1	139.83	12	69	1	12	0	2	0	4.17	3	20.17	91.45
305	1017	10	17	0	0	298	67.1808	33.9238	138	8.6	39.36	14	81	2	24	1	3	0	4.09	3.31	21.66	89.66
306	1018	10	18	0	0	312	76.7735	53.1139	192	14.6	20.94	10	50	0	1	0	1	19	4	3.29	21.66
307	1019	10	19	0	0	325	89.8615	72.304	199	14.8	13.96	8	25	0	2	0	1	3	3.99	2.54	20.94
308	1020	10	20	0	0	337	105.147	91.499	190	12.2	10.44	9	41	0	0	0	0	5	4.01	3.13	21.58	92.33
309	1021	10	21	0	0	350	119.804	110.88	175	8.1	30.93	7	49	0	0	0	0	12	4.11	3.52	22.13	91.65
310	1022	10	22	0	0	355	126.311	130.448	153	7.2	25.53	11	27	0	3	2	0	58	4.38	3.04	20.81
311	1023	10	23	0	1	344	132.818	150.129	170	9.3	27.07	10	35	1	4	1	1	11	4.74	2.78	19.47	92.74
312	1024	10	24	0	1	333	139.325	169.885	182	8.8	24.46	12	38	0	2	1	1	19	5.04	3.54	18.51	89.3
313	1025	10	25	0	1	324	145.832	189.693	202	9.7	24.72	11	29	0	3	1	2	39	5.16	3.82	17.77
314	1026	10	26	0	1	315	152.339	209.536	200	9.2	19.51	12	31	2	2	5	2	53	5.22	4.35	17.42
315	1027	10	27	0	1	308	158.846	223.287	197	9.7	5.77	7	22	1	1	3	2	47	5.32	4.62	17.31	92.08
316	1028	10	28	0	1	302	165.357	231.79	236	10.7	17.34	7	23	0	1	2	2	26	5.57	4.78	17.58	90.2
317	1029	10	29	0	1	297	173.019	238.413	220	10.7	20.18	6	24	0	0	1	2	19	5.72	5.99	18.53
318	1030	10	30	0	1	293	179.768	243.243	243	12.3	38.25	6	20	1	9	3	2	31	5.72	4.99	19.18
319	1031	10	31	0	1	290	185.679	249.586	229	12.8	30.13	5	20	0	1	7	2	22	5.64	7.3	19.25	93.22
320	1032	10	32	0	1	289	191.59	257.331	209	13.1	28.91	5	16	0	0	23	3	18	5.48	7.86	19.05	87.33
321	1101	11	1	1	0	232	90.8276	141.978	173	7.8	30.56	10	348	1	16	7	1	0	5.03	5.7	13.1
322	1102	11	2	1	0	228	95.1428	158.078	192	8.7	32.08	13	354	8	2	0	1	0	5.08	4.68	13.66
323	1103	11	3	1	0	225	103.221	172.934	157	7.2	19.04	17	286	1	0	0	1	0	5.37	4.44	14.22	92.64
324	1104	11	4	1	0	222	114.268	185.541	133	5.7	41.68	14	145	0	2	0	0	0	5.6	4.64	13.96
325	1105	11	5	1	0	221	127.513	182.868	192	6.5	14.53	11	124	0	1	0	0	0	5.83	5.08	12.94
326	1106	11	6	1	0	221	130.015	166.82	281	10.3	26.55	15	137	0	1	0	1	0	5.89	4.24	11.77
327	1107	11	7	1	0	224	121.173	148.066	302	13.1	27.33	8	98	0	1	0	0	0	5.86	2.3	10.83	90.68
328	1108	11	8	1	0	228	114.758	129.34	297	13.5	26.59	9	55	0	1	0	1	0	5.87	3.57	10.39
329	1109	11	9	1	0	234	111.395	110.189	294	12.6	29.04	8	40	0	3	0	1	0	5.78	3.68	10.41	90.2
330	1110	11	10	1	0	239	106.423	91.0375	309	13	19.92	9	24	0	8	0	0	0	5.43	3.55	11.18
331	1111	11	11	1	0	246	97.2923	71.9036	292	10.3	37.76	10	23	2	1	0	1	0	5.12	3.34	11.9
332	1112	11	12	1	0	255	88.8476	53.2439	292	10.2	39.84	8	25	0	1	0	1	0	4.79	2.52	12.42
333	1113	11	13	0	0	264	81.9466	35.1006	278	10.5	28.82	10	32	0	0	0	1	15	4.55	2.9	13.64
334	1114	11	14	0	0	275	76.9335	16.9576	297	10.9	21.2	14	33	0	7	16	1	1	4.53	3.02	15.57
335	1115	11	15	0	0	287	75.314	1.18581	181	6.8	32.34	15	58	0	49	4	2	0	4.49	3.12	18.27
336	1116	11	16	0	0	300	78.9028	20.3675	87	3.6	65.47	14	97	0	17	0	2	0	4.35	2.98	20.99
337	1117	11	17	0	0	313	85.8757	39.5576	133	8.2	23.42	12	77	0	12	0	3	2	4.31	3.15	22.68	90.86
338	1118	11	18	0	0	326	93.7868	58.7477	180	14.6	9.6	14	52	0	5	0	2	8	4.19	3.18	22.52	93.56
339	1119	11	19	0	0	340	104.771	77.9378	174	13.6	21.87	8	26	0	2	1	1	11	4.06	3.65	21.31
340	1120	11	20	0	0	353	118.143	97.1279	164	11.9	27.06	10	35	0	0	2	1	0	4.01	3.46	21.7	92.81
341	1121	11	21	0	0	365	133.187	116.318	140	8.5	15.4	8	39	1	1	1	1	4	4	3.5	22.21	92.33
342	1122	11	22	0	0	371	145.223	135.508	152	7	44.53	10	42	0	0	0	0	5	4.09	2.49	20.68	90.4
343	1123	11	23	0	1	361	151.73	154.698	169	7.9	16.32	12	32	0	3	0	2	56	4.43	2.43	19.09	91.65
344	1124	11	24	0	1	351	158.237	173.941	149	7.9	25.47	9	26	0	2	1	2	29	4.75	3.5	18.02	88.95
345	1125	11	25	0	1	342	164.744	193.333	141	6.7	25.03	11	33	0	3	1	3	21	4.91	3.79	16.98
346	1126	11	26	0	1	334	171.251	212.838	157	7.1	21.5	6	28	1	2	0	3	33	4.93	4.83	16.19	88.83
347	1127	11	27	0	1	327	177.758	232.427	195	9.1	11.46	8	19	1	1	4	2	49	5.02	5.24	15.83	90.44
348	1128	11	28	0	1	321	184.265	249.892	179	8.8	14.48	7	24	0	1	8	3	55	5.3	4.55	16.15	90.78
349	1129	11	29	0	1	316	191.258	258.033	235	11.8	32.66	9	16	0	3	3	2	7	5.52	4.81	17.34	92.4
350	1130	11	30	0	1	313	198.874	262.501	236	11.8	34.06	8	16	0	2	4	2	10	5.7	4.93	18.38
351	1131	11	31	0	1	310	204.786	268.39	231	11.7	35.62	4	7	0	7	1	2	23	5.7	7.22	18.57
352	1132	11	32	0	1	309	210.697	275.607	215	11.7	27.96	4	9	0	7	18	3	41	5.54	7.65	18.49	88.36
353	1201	12	1	0	0	252	110.727	154.779	187	8.7	36.64	13	320	3	3	0	1	0	5.3	5.15	12.85
354	1202	12	2	1	0	247	114.293	170.018	204	10.1	29.98	15	344	1	0	0	1	0	5.37	3.63	13.32
355	1203	12	3	1	0	244	121.101	186.042	146	7.2	25.64	19	343	0	0	0	1	0	5.58	4.82	13.83
356	1204	12	4	1	0	242	130.644	200.635	133	5.6	11.71	9	132	5	2	0	0	0	5.69	4.91	13.58	93.36
357	1205	12	5	1	0	241	142.374	180.967	177	6.4	17.38	6	175	9	0	0	0	0	5.73	6.2	12.6	89.97
358	1206	12	6	1	0	241	147.815	161.382	203	7.3	28.2	10	169	0	0	0	1	0	5.6	4.74	11.45	92.88
359	1207	12	7	1	0	244	139.772	141.912	255	9.3	27.72	12	137	0	0	1	0	0	5.47	3.62	10.58	89.52
360	1208	12	8	1	0	248	134.248	122.614	294	11.3	26.51	13	128	0	0	0	0	0	5.67	3.65	10.31	89.8
361	1209	12	9	1	0	253	131.221	103.581	276	11.5	25.02	11	50	0	0	0	1	0	5.78	3.39	10.58	89.7
362	1210	12	10	1	0	258	124.217	84.9127	152	13.6	18.83	9	28	0	4	0	0	0	5.48	3.89	11.55
363	1211	12	11	1	0	265	115.111	66.1216	93	8.6	30.41	9	25	0	3	0	1	0	5.24	3.78	12.63
364	1212	12	12	0	0	273	107.575	46.9704	105	8.9	19.91	6	16	1	1	0	1	0	5.07	3.31	13.65	90.15
365	1213	12	13	0	0	282	101.203	27.8192	155	9.6	18.72	11	28	0	13	1	1	1	4.91	3.14	15.4
366	1214	12	14	0	0	292	96.5785	8.66798	205	9.9	19.25	8	19	1	11	0	2	0	4.92	2.85	17.68	89.47
367	1215	12	15	0	0	303	95.2935	9.60157	201	8.1	18.71	9	39	2	50	0	1	0	4.82	3.74	19.97	92.47
368	1216	12	16	0	0	315	98.1545	27.7445	117	5.4	92.05	16	34	3	22	0	4	0	4.7	4.3	22.14	91.61
369	1217	12	17	0	0	328	104.575	45.8875	117	7	13.68	13	42	0	8	2	3	0	4.74	2.95	23.92	88.4
370	1218	12	18	0	0	341	111.793	64.4273	158	13.1	17.95	16	57	0	6	1	1	4	4.64	2.86	23.61
371	1219	12	19	0	0	354	121.156	83.5716	154	13.3	13.76	11	37	0	1	0	1	9	4.36	2.68	21.91
372	1220	12	20	0	0	369	132.889	102.762	147	12	13.36	8	37	0	1	0	0	6	4.19	3.23	21.9	92.19
373	1221	12	21	0	0	381	146.426	121.952	149	13.3	9.21	9	28	0	1	1	0	1	4.12	4.17	22.15	91.72
374	1222	12	22	0	0	388	161.312	141.142	137	8.6	0	8	39	0	2	0	1	4	4.05	2.94	20.4	88.85
375	1223	12	23	0	0	378	170.642	160.332	120	6	69.98	9	38	0	3	0	0	20	4.38	2.44	18.34	91.6
376	1224	12	24	0	0	368	177.149	179.522	149	7.2	31.12	12	28	3	4	2	3	52	4.89	3.81	17.3	89
377	1225	12	25	0	0	360	183.656	198.712	168	8.5	24.32	7	15	0	1	12	3	17	4.95	4	15.97
378	1226	12	26	0	0	352	190.163	217.902	211	11.1	26.26	6	30	1	0	0	3	28	4.65	2.98	14.57	89.07
379	1227	12	27	0	0	346	196.67	237.101	221	10.8	20.87	12	24	0	2	4	2	20	4.73	3.47	13.94
380	1228	12	28	0	0	340	203.177	256.396	197	8.8	19.42	8	19	1	1	14	2	50	4.86	3.42	14.37	88.83
381	1229	12	29	0	0	336	209.805	275.792	171	8.5	22.94	9	22	0	0	5	2	18	5.32	4.89	15.95
382	1230	12	30	0	0	332	217.72	281.863	195	9	31.12	9	15	0	2	6	1	29	5.72	5.93	17.32
383	1231	12	31	0	0	330	223.892	287.355	189	9	24.36	4	9	2	8	22	2	72	5.74	5.78	17.39	92.88
384	1232	12	32	0	0	329	229.803	294.107	188	8.7	32.77	7	17	1	3	15	3	54	5.61	5.79	17.51	86.57
385	1301	13	1	0	0	271	130.657	168.902	206	9.7	33.91	8	310	2	22	22	2		5.56	5.26	12.75	91.35
386	1302	13	2	0	0	267	133.692	183.044	192	9	41.33	7	147	3	6	0	3		5.65	4.88	13.05
387	1303	13	3	0	0	264	139.557	198.128	184	8.8	17.4	9	154	0	0	0	2	5	5.71	5.2	13.35
388	1304	13	4	0	0	262	147.914	192.74	166	7.6	32.43	7	254	0	2	0	1	0	5.72	5.05	13.19
389	1305	13	5	1	0	261	158.37	176.839	189	8.3	19.13	12	263	1	6	0	0	0	5.66	5.17	12.48	89.7
390	1306	13	6	1	0	261	165.84	158.302	261	9.8	23.45	11	169	4	1	0	1	0	5.43	4.5	11.47
391	1307	13	7	1	0	263	158.711	138.4	262	9.1	25.91	9	52	0	0	0	0	0	5.22	3.88	10.68	93.22
392	1308	13	8	1	0	267	153.87	118.53	261	9	21.6	17	82	0	0	0	0	0	5.41	3.76	10.45	89.88
393	1309	13	9	1	0	272	151.067	98.7139	202	12.5	28.45	10	61	0	4	1	1	0	5.68	3.43	10.81
394	1310	13	10	1	0	277	142.011	78.9898	116	14.2	17.71	10	57	0	1	0	0		5.65	3.78	12.18	87.7
395	1311	13	11	1	0	284	133.379	59.4504	131	10.2	12.73	9	76	0	0	0	1	0	5.53	3.76	13.84	92.29
396	1312	13	12	0	0	291	126.301	40.3648	70	7.6	29.14	9	19	0	0	0	2	0	5.35	3.54	15.37
397	1313	13	13	0	0	299	120.582	21.759	130	8.3	22.11	7	32	0	15	0	2	0	5.15	3.38	17.45	89.64
398	1314	13	14	0	0	309	116.345	2.9033	120	8.7	29.38	16	79	0	13	0	0	0	5.11	3.9	19.99	93.68
399	1315	13	15	0	0	320	115.28	16.2479	184	7.2	35.93	13	89	0	18	0	3	0	5.09	3.72	21.9
400	1316	13	16	0	0	331	117.656	35.3991	123	5.8	148.66	8	83	1	16	0	4	0	5.03	3.59	23.42
401	1317	13	17	0	0	343	123.274	54.3037	136	6.3	71.6	9	54	1	10	0	3	1	5.1	3.18	24.63	90.61
402	1318	13	18	0	0	356	130.369	72.4467	123	7.2	26.39	11	60	0	4	0	2	15	5.02	3.13	24.2	92.95
403	1319	13	19	0	0	369	138.494	90.5896	125	10.2	21.22	14	63	0	6	0	1	10	4.64	3.09	22.78
404	1320	13	20	0	0	383	148.867	108.889	138	13.5	21.23	9	30	0	4	1	2	29	4.45	3.27	22.48	92.74
405	1321	13	21	0	0	397	161.066	127.673	145	14.9	15.18	13	36	0	3	2	0	3	4.38	3.61	22.29	92.81
406	1322	13	22	0	0	405	174.709	146.776	133	13.7	24.74	8	30	0	4	2	0	7	4.28	3.19	20.56	87.86
407	1323	13	23	0	0	395	189.484	165.966	118	12.5	12	8	39	0	1	0	0	1	4.48	2.94	18.25
408	1324	13	24	0	0	386	196.061	185.156	143	10.6	15.94	9	31	0	0	0	1	22	4.84	3.64	16.33	88.44
409	1325	13	25	0	0	378	202.568	204.346	202	12.1	28.66	13	41	1	0	2	2	11	4.8	3.88	14.58
410	1326	13	26	0	0	371	209.075	223.536	221	11.4	31.87	16	32	0	0	2	1	25	4.55	3.77	13.2
411	1327	13	27	0	0	365	215.582	242.726	192	9.3	22.13	6	12	0	0	10	2	23	4.69	2.45	12.58	90.61
412	1328	13	28	0	0	360	222.089	261.916	235	10.5	16.71	9	34	0	2	16	3	46	4.74	3.38	13.21	89.97
413	1329	13	29	0	0	355	228.596	281.106	238	11.8	29.11	7	12	0	2	23	2	45	5.08	4.69	14.72	92.61
414	1330	13	30	0	0	352	235.912	300.297	220	11.1	16.92	6	14	1	0	17	2	39	5.53	5.25	16.07
415	1331	13	31	0	0	350	242.999	306.452	184	8.6	14.8	5	10	0	5	5	2	70	5.7	5.61	16.67
416	1332	13	32	0	0	349	248.91	312.792	188	8.7	38.29	8	15	0	7	3	3	36	5.66	5.88	17.04	90.25
417	1401	14	1	0	0	290	150.605	183.27	205	9.8	36.05	5	154	1	16	5	3		5.76	5.91	12.29	89.25
418	1402	14	2	0	0	287	153.246	197.183	198	9.4	29.75	8	334	2	6	4	1		5.85	5.97	12.52	90.22
419	1403	14	3	0	0	284	158.388	199.355	153	7.5	32.33	4	19	0	23	33	3		5.72	5.7	12.84
420	1404	14	4	0	0	282	165.799	181.847	212	9.7	25.84	6	8	0	21	0	4		5.65	5.43	12.87	92.61
421	1405	14	5	0	0	281	175.191	164.907	228	10.6	18.95	8	91	0	8	27	0	18	5.62	5.5	12.5
422	1406	14	6	0	0	281	184.272	148.728	259	10.4	27.9	12	198	0	0	0	1	0	5.37	4.38	11.63	91.18
423	1407	14	7	1	0	283	177.884	133.136	295	12.6	34.66	8	92	0	0	1	0	0	5.11	2.67	10.92	89.85
424	1408	14	8	1	0	287	173.577	116.733	232	10.6	23.86	9	52	0	0	0	0	0	5.25	3.83	10.86
425	1409	14	9	1	0	291	168.936	97.6982	133	13.3	10.74	9	83	0	0	0	1	0	5.56	3.7	11.33	91.18
426	1410	14	10	1	0	297	159.831	77.7006	158	14.2	11.1	10	58	1	0	0	0	0	5.82	3.9	13.09	87.88
427	1411	14	11	0	0	302	152.05	57.703	146	10.9	21.46	7	63	0	0	0	1	0	5.86	4.27	15.29	86.55
428	1412	14	12	0	0	309	145.187	37.7055	44	8.6	32.14	7	32	0	2	0	2	0	5.65	4.86	17.38	91.94
429	1413	14	13	0	0	317	139.96	17.7079	15	6.9	29.47	9	36	0	10	4	1	0	5.31	3.86	19.62	90.88
430	1414	14	14	0	0	326	136.179	2.28964	103	7.9	54.84	10	24	0	65	5	2	1	5.09	4.55	22.02	91.27
431	1415	14	15	0	0	336	135.271	22.2872	132	5.2	64.79	10	105	0	5	0	2	0	5.23	3.65	23.59	93.15
432	1416	14	16	0	0	347	137.301	41.3946	118	5.4	38.92	11	39	4	11	0	4	0	5.24	3.35	24.55	89.5
433	1417	14	17	0	0	359	142.144	60.315	173	8.2	56.51	9	69	0	8	2	3	19	5.23	2.99	25	93.9
434	1418	14	18	0	0	371	149.068	79.4662	142	6.8	85.74	10	100	0	4	0	3	8	5.11	3.03	24.55
435	1419	14	19	0	0	384	156.468	98.6174	107	5.7	42.2	7	93	0	5	0	4	4	4.74	3.72	23.69
436	1420	14	20	0	0	397	165.72	117.149	116	8.3	35.03	11	152	0	12	0	3	25	4.62	3.45	23.51	91.92
437	1421	14	21	0	0	411	176.76	135.292	140	11.2	29.27	12	70	0	3	1	1	36	4.62	3.31	23.13	92.54
438	1422	14	22	0	0	423	189.275	153.501	127	10.2	25.33	11	21	0	0	0	1	25	4.49	3.03	21.34
439	1423	14	23	0	0	413	202.992	172.065	152	12.6	23.94	8	29	0	4	1	1	22	4.5	2.5	18.69
440	1424	14	24	0	0	405	214.973	190.918	167	17.4	27.24	9	28	0	1	0	1	7	4.57	3.53	15.67	89.07
441	1425	14	25	0	0	397	221.48	209.984	184	15.8	15.28	8	38	0	1	1	1	7	4.49	3.91	13.66
442	1426	14	26	0	0	390	227.986	229.17	189	10	20.19	7	19	1	0	10	1	58	4.4	6.1	12.66	93.56
443	1427	14	27	0	0	384	234.493	248.36	139	6.3	30.72	8	21	0	1	1	2	12	4.38	4.65	12.57	88.23
444	1428	14	28	0	0	379	241	267.55	183	8.5	18.21	11	22	0	0	19	2	76	4.39	4.28	13.19
445	1429	14	29	0	0	375	247.507	286.74	211	9.9	35.19	9	19	0	7	34	3	116	4.8	4.46	14.32
446	1430	14	30	0	0	372	254.348	305.93	221	11.3	24.61	8	15	2	0	19	2	95	5.37	4.21	15.41	92.74
447	1431	14	31	0	0	370	262.105	325.12	241	12.2	26.13	3	12	1	3	9	2	43	5.68	6.13	16.53	89.06
448	1432	14	32	0	0	369	268.016	331.631	233	11.6	39.22	6	12	2	3	20	3	54	5.7	6.6	17.11	89.6
449	1501	15	1	0	0	310	170.566	197.466	219	10.4	33.23	5	343	2	12	0	1		5.68	5.5	11.77
450	1502	15	2	0	0	306	172.902	205.398	185	8.6	24.5	6	476	1	1	3	2		5.65	4.7	11.91	93.63
451	1503	15	3	0	0	304	177.476	190.582	130	6.2	19.35	9	141	0	51	39	2		5.68	5.1	12.3	90.92
452	1504	15	4	0	0	302	184.12	172.593	115	5.8	38.31	5	14	0	15	4	4		5.66	4.69	12.56
453	1505	15	5	0	0	301	192.62	154.642	143	6.6	25.78	6	20	1	6	13	4		5.54	4.71	12.4	91.52
454	1506	15	6	0	0	301	202.744	137.258	215	9.4	15.72	8	29	0	2	7	4	0	5.37	4.21	11.85	92.4
455	1507	15	7	0	0	303	197.22	120.688	169	11.3	10.12	11	34	0	1	0	0	5	5.26	3.77	11.57
456	1508	15	8	0	0	306	193.345	105.016	166	12.1	17.48	11	43	0	0	3	0	0	5.34	3.78	11.98
457	1509	15	9	1	0	311	186.73	89.2332	141	13.1	16.8	12	119	0	0	0	1	0	5.56	3.67	12.94
458	1510	15	10	1	0	316	178.003	72.176	160	13.4	25.98	11	128	4	0	0	0	0	5.75	4.01	14.6
459	1511	15	11	0	0	321	170.777	55.1188	151	13.5	24.34	12	35	0	0	0	2	0	5.86	4.66	16.97
460	1512	15	12	0	0	328	164.336	38.0178	18	9.7	37	8	37	1	5	0	2	0	5.79	4.71	19.52	93.06
461	1513	15	13	0	0	336	159.373	18.0202	81	5.9	43.36	11	22	0	11	0	3	0	5.52	3.45	21.64	89.51
462	1514	15	14	0	0	344	156.056	1.97736	139	6.2	47.36	14	47	10	22	0	3	0	5.34	2.78	23.7	90.47
463	1515	15	15	0	0	354	155.264	21.9749	125	7.9	66.92	10	50	5	24	2	4	0	5.31	3.24	25.43
464	1516	15	16	0	0	364	157.036	41.9734	178	8.5	18.93	17	41	0	17	1	3	9	5.16	3.99	26.26	90.39
465	1517	15	17	0	0	375	161.288	61.9728	232	12.5	31.27	12	33	0	9	0	2	21	5.09	3.29	26.42	90.01
466	1518	15	18	0	0	387	167.767	81.9725	250	11.2	50.89	10	25	0	9	0	1	6	5.05	3.22	26	93.5
467	1519	15	19	0	0	399	174.883	101.972	137	6.5	135.68	10	92	0	1	1	1	2	4.94	3.84	25.37	90.87
468	1520	15	20	0	0	412	183.208	121.972	111	5.8	107.49	12	101	0	1	5	3	0	4.84	3.64	25.11	92.33
469	1521	15	21	0	0	426	193.251	141.972	105	7.6	42.38	11	153	0	1	5	3	12	4.81	3.76	24.43	92.4
470	1522	15	22	0	0	439	204.76	161.836	154	11.5	33.24	12	89	1	8	0	2	21	4.62	3.27	22.21	91.2
471	1523	15	23	0	0	431	217.503	179.994	173	12.1	20.31	11	32	1	5	0	1	16	4.49	3.01	19.29
472	1524	15	24	0	0	423	231.276	198.163	183	15.2	20.26	11	30	0	1	0	0	6	4.52	3.42	16.54	89.89
473	1525	15	25	0	0	416	240.391	216.592	176	17.2	15.86	12	28	1	1	1	1	8	4.34	3.4	14.58	87.52
474	1526	15	26	0	0	409	246.898	235.278	155	11.2	11.86	12	28	0	0	3	1	16	4.17	4.2	13.6
475	1527	15	27	0	0	403	253.405	254.164	143	7.4	16.1	9	33	0	0	0	1	1	4.11	4.44	13.68	91.29
476	1528	15	28	0	0	399	259.912	273.209	157	7.1	26.41	9	22	0	0	23	2	105	4.21	4.94	14.36	89.56
477	1529	15	29	0	0	395	266.419	292.374	169	7.6	22.09	10	24	0	3	35	3	101	4.65	4.83	15.28
478	1530	15	30	0	0	392	273.004	311.564	175	8.3	37.77	9	17	1	2	31	2	0	5.2	5.02	16.26
479	1531	15	31	0	0	390	280.588	330.754	219	10.4	16.9	6	24	0	2	0	1	69	5.48	5.27	17.14	93.29
480	1532	15	32	0	0	389	287.123	349.944	216	10.5	30.87	6	16	1	5	5	1	80	5.53	5.9	17.69	87.79
481	1601	16	1	0	0	330	190.534	207.225	214	10.2	34.86	9	286	3	19	0	2		5.54	4.99	11.67	86.69
482	1602	16	2	0	0	326	192.629	192.033	189	8.8	36	7	371	2	4	0	2		5.43	3.26	11.72
483	1603	16	3	0	0	324	196.744	177.155	107	5.3	31.15	8	303	4	40	0	1		5.59	4.87	12.17	94.24
484	1604	16	4	0	0	322	202.758	162.311	99	4.9	33.01	7	45	0	13	15	3		5.68	4.02	12.62	92.22
485	1605	16	5	0	0	321	210.507	146.389	120	4.9	32.15	9	21	2	7	6	4		5.56	4.19	12.81	90.91
486	1606	16	6	0	0	321	219.809	127.905	152	10	8.39	14	26	0	7	5	3		5.51	3.89	12.67	94.61
487	1607	16	7	0	0	323	216.677	109.934	172	10.5	18.5	9	22	1	5	0	4	6	5.51	3.86	12.85	93.02
488	1608	16	8	0	0	326	213.156	92.7966	112	13	16.13	7	19	0	3	6	3	0	5.58	3.76	13.72
489	1609	16	9	0	0	330	204.551	76.8968	95	12.8	24.81	9	26	0	0	0	3	0	5.71	3.37	14.95	92.54
490	1610	16	10	0	0	335	196.531	61.3123	91	13.7	25.61	10	33	3	0	0	3	0	5.78	4.44	16.56
491	1611	16	11	0	0	341	189.515	44.676	36	14.3	25.43	6	16	0	8	1	4	0	5.79	4.34	18.77	93.29
492	1612	16	12	0	0	347	183.664	27.6188	58	8.7	32.06	10	40	0	14	0	4	1	5.71	4.05	21.35
493	1613	16	13	0	0	354	178.909	10.5616	120	5	48.29	11	38	0	8	0	4	0	5.53	3.34	23.37	92.35
494	1614	16	14	0	0	362	175.96	6.49556	160	9.5	104.95	9	25	7	5	0	4	0	5.36	2.2	25.16	87.45
495	1615	16	15	0	0	371	175.258	23.9052	155	7.3	81.55	13	34	0	1	0	4	0	5.16	3.64	26.68	92.74
496	1616	16	16	0	0	381	176.83	43.1319	180	8.5	28.3	11	31	0	2	0	3	6	4.97	5.44	27.45
497	1617	16	17	0	0	392	180.617	62.8431	198	10	25.63	13	35	0	2	1	2	6	4.87	3.79	27.45	89.34
498	1618	16	18	0	0	403	186.483	82.6932	241	9	17.7	11	27	0	7	0	1	5	4.88	3.43	26.93
499	1619	16	19	0	0	415	193.562	102.601	192	7.4	36.96	13	97	0	3	0	2	0	4.99	4.84	26.27
500	1620	16	20	0	0	428	201.164	122.54	119	5.5	77.35	7	85	0	1	0	2	2	5	4	26.08	90
501	1621	16	21	0	0	441	210.351	142.495	122	6.3	30.71	9	86	0	3	0	3	5	5	4.87	25.81	92.81
502	1622	16	22	0	0	454	220.972	162.462	148	11	6.14	14	64	0	0	1	3	13	4.75	3.71	23.77	89.57
503	1623	16	23	0	0	449	232.829	182.435	161	12.8	14.73	8	24	0	2	0	1	4	4.58	2.55	20.99
504	1624	16	24	0	0	441	245.745	202.414	156	13.1	17.9	8	22	0	1	3	1	19	4.61	3.29	18.67	91.2
505	1625	16	25	0	0	434	259.303	222.397	152	16.6	20.36	7	30	1	0	7	1	7	4.37	2.64	16.81
506	1626	16	26	0	0	428	265.81	242.383	146	16.1	22.89	10	24	1	0	8	1	22	4.09	3.82	15.68	93.29
507	1627	16	27	0	0	423	272.317	261.186	137	11.1	13.07	10	27	0	2	125	3	10	4.09	4.42	15.76
508	1628	16	28	0	0	418	278.824	279.753	123	7.7	13.73	12	23	6	2	44	4	43	4.31	6.11	16.4	87.74
509	1629	16	29	0	0	414	285.331	298.505	136	6.5	25.27	7	24	0	0	37	4	63	4.72	5.18	17.13	92.67
510	1630	16	30	0	0	412	291.838	317.409	153	6.9	32.78	6	11	0	4	19	4	59	5.12	5.5	17.89
511	1631	16	31	0	0	410	298.945	336.441	162	7.4	22.35	6	19	1	7	25	4	86	5.33	4.72	18.51	88.48
512	1632	16	32	0	0	409	306.229	355.578	151	7.2	30.3	6	18	0	2	23	4	49	5.34	5.87	18.86	87.74
513	1701	17	1	0	0	349	210.509	195.32	175	8.4	35.01	7	575	0	24	0	1		5.56	5.62	12.11	94.22
514	1702	17	2	0	0	346	212.407	179.133	109	5.4	18.98	9	582	4	3	0	1		5.46	4.7	12.22	95.93
515	1703	17	3	0	0	343	216.146	163.79	100	5	45.67	10	289	0	19	0	1		5.56	4.62	12.65	93.63
516	1704	17	4	0	0	341	221.634	148.911	94	4.3	61.95	5	42	0	5	0	1		5.68	4.33	13.28	93.08
517	1705	17	5	0	0	341	228.745	134.045	81	5.9	10.73	7	46	0	15	20	2		5.69	4.61	13.98	93.51
518	1706	17	6	0	0	341	237.332	119.586	40	9.8	21.23	9	23	0	2	7	2		5.71	4.97	14.43
519	1707	17	7	0	0	343	236.225	101.836	27	11.2	28.61	10	25	1	1	15	3		5.79	4.42	15.03	89.08
520	1708	17	8	0	0	346	231.449	83.2526	20	12.9	19.14	10	28	0	3	0	3	0	5.83	4.42	16.06	88.66
521	1709	17	9	0	0	350	222.667	65.2442	31	12.3	21.86	7	20	0	6	4	2	6	5.88	4.87	17.52
522	1710	17	10	0	0	355	215.252	48.7774	41	14	17.75	7	26	0	5	0	1	0	5.94	3.89	19.32	93.36
523	1711	17	11	0	0	360	208.43	33.1929	53	14.1	22.27	10	23	0	2	4	1		5.78	3.63	21.24	88.98
524	1712	17	12	0	0	366	203.043	17.176	117	7.6	25.14	10	26	1	13	0	1	0	5.44	2.87	23.09	92.08
525	1713	17	13	0	0	372	198.538	0.118794	136	7.2	26.9	8	73	0	3	0	3	0	5.29	3.22	25.01	89.32
526	1714	17	14	0	0	380	195.884	16.9384	147	7.2	89.99	10	42	0	18	2	4	1	5.17	4.47	26.53	89.9
527	1715	17	15	0	0	389	195.254	33.9956	178	8.7	47.7	13	41	1	4	0	2	26	5.06	3.39	27.35
528	1716	17	16	0	0	398	196.666	51.0527	220	10.5	30.75	8	27	0	3	1	1	24	4.93	3.1	27.41	89.81
529	1717	17	17	0	0	408	200.078	68.5686	228	12.8	18.12	10	27	1	3	0	2	65	4.71	3.23	26.95	86.97
530	1718	17	18	0	0	419	205.389	87.1238	250	11.7	0	8	25	0	1	0	1	23	4.69	3.17	26.19	93.63
531	1719	17	19	0	0	431	212.261	106.205	282	13	32.65	11	45	0	10	0	1	12	4.8	2.67	25.26
532	1720	17	20	0	0	443	219.474	125.572	187	9.1	34.38	13	86	0	11	0	2	6	4.95	3.14	25.61	92.47
533	1721	17	21	0	0	456	227.924	145.111	150	7.1	52.2	8	108	0	3	6	1	1	5.09	3.83	26.62	93.15
534	1722	17	22	0	0	469	237.761	164.761	115	6.3	59.2	11	67	1	0	0	2	9	5.07	3.81	26.17	91.14
535	1723	17	23	0	0	468	248.82	184.486	135	9.9	21.65	12	33	1	2	3	2	38	5	3.36	24.49
536	1724	17	24	0	0	460	260.945	204.264	145	12.3	18.07	7	23	0	2	4	2	38	4.94	3.67	22.24	89.06
537	1725	17	25	0	0	453	273.995	224.082	153	14.8	12.05	11	33	0	0	2	1	14	4.64	3.77	20.26	90.14
538	1726	17	26	0	0	447	284.722	243.93	151	15.6	13.62	11	36	0	0	7	1	24	4.16	3.59	18.99
539	1727	17	27	0	0	442	291.229	263.8	149	15.3	17.95	9	23	0	1	74	1	58	4.29	4.19	18.72	92.88
540	1728	17	28	0	0	438	297.736	283.689	147	12.8	21.06	10	28	0	0	59	4	39	4.74	5.2	19.06	88.36
541	1729	17	29	0	0	434	304.243	303.593	120	8.6	7.69	5	37	0	4	26	3	64	4.95	4.9	19.47
542	1730	17	30	0	0	432	310.75	323.508	124	6.9	25.07	9	20	0	8	35	3	37	5.16	5.07	19.85	92.4
543	1731	17	31	0	0	430	317.5	342.945	122	5.7	30.85	7	25	0	12	47	3	57	5.35	4.87	20.24
544	1732	17	32	0	0	429	325.276	361.738	117	5.4	31.5	8	24	6	1	67	4	15	5.34	5.25	20.4	85.38
545	1801	18	1	0	0	369	230.488	183.528	130	6.4	12.4	8	157	1	31	0	1		5.68	5.87	13.07	89.74
546	1802	18	2	0	0	366	232.223	167.62	128	6.5	36.65	9	413	0	6	1	0		5.58	4.89	13.25	93.22
547	1803	18	3	0	0	363	235.648	151.113	132	5.7	59.78	9	350	0	9	0	1		5.64	4.62	13.74	91.71
548	1804	18	4	0	0	361	240.691	135.55	98	4.5	26.31	9	109	0	10	4	2		5.76	4.42	14.49
549	1805	18	5	0	0	361	247.255	120.667	20	7.9	32.55	7	16	0	4	2	2		5.85	6.44	15.44	93.43
550	1806	18	6	0	0	361	255.22	105.789	16	9.2	32.68	7	19	9	11	4	3		5.94	5.42	16.3	90.1
551	1807	18	7	0	0	363	255.843	91.3078	46	11.3	25.3	8	25	1	4	41	2		6	4.59	17.31
552	1808	18	8	0	0	365	249.272	75.8784	10	12.7	14.67	6	34	0	2	0	2		5.95	4.64	18.68	89.5
553	1809	18	9	0	0	369	241.081	57.2824	8	13.3	13.97	11	33	0	2	4	2	3	5.91	5.26	20.69	87.97
554	1810	18	10	0	0	374	233.979	38.6863	21	13.7	24.82	11	22	0	10	2	1	1	5.92	3.87	23.18
555	1811	18	11	0	0	379	227.531	20.6933	54	11.7	30.21	12	46	0	1	4	2	0	5.7	3.56	25.07	92.46
556	1812	18	12	0	0	385	222.421	5.07354	130	5	29.75	11	33	3	3	6	3	0	5.26	2.8	26.23	90.78
557	1813	18	13	0	0	391	218.234	10.5109	142	7.1	45.9	12	27	0	0	0	4	0	5.11	3.27	27.54	89.78
558	1814	18	14	0	0	399	215.822	27.3812	200	10.4	46.41	14	28	0	18	2	4	0	5.05	4.61	28.31	89.7
559	1815	18	15	0	0	407	215.25	44.4384	244	15	19.23	10	34	0	16	0	4	34	4.91	3.39	27.69	93.36
560	1816	18	16	0	0	416	216.532	61.4956	246	16.9	24.67	11	29	0	0	1	3	42	4.72	3.1	26.39	89.15
561	1817	18	17	0	0	426	219.635	78.5528	246	17.4	18.63	13	40	0	7	2	2	21	4.53	3.16	25.42	90.08
562	1818	18	18	0	0	436	224.484	95.6188	270	15.5	17.28	10	37	0	2	0	1	2	4.47	3.07	24.67
563	1819	18	19	0	0	447	230.96	113.278	292	16.7	18.93	12	31	1	8	1	4	11	4.57	2.49	24.01	91.07
564	1820	18	20	0	0	459	238.056	131.608	268	14.2	25.57	10	41	0	4	0	3	18	4.76	3.03	24.82	91.77
565	1821	18	21	0	0	471	245.869	150.365	231	11	21.36	14	125	0	0	1	2	13	5.04	3.6	26.75	92.4
566	1822	18	22	0	0	484	255.014	169.406	158	7.6	37.01	10	207	0	0	66	1	0	5.23	3.43	28.16
567	1823	18	23	0	0	486	265.355	188.646	129	6.3	54.89	7	45	0	0	60	4	0	5.19	3.39	28.09
568	1824	18	24	0	0	479	276.756	208.03	128	8.6	23.94	8	69	0	0	6	4	1	5.11	3.76	26.34
569	1825	18	25	0	0	472	289.093	227.52	161	13.7	26.1	13	32	0	0	30	4	29	4.85	3.9	24.27
570	1826	18	26	0	0	466	302.251	247.091	158	13.4	24.95	10	22	0	2	12	4	41	4.42	3.64	22.55
571	1827	18	27	0	0	461	310.141	266.727	152	14	28.23	7	26	0	7	13	4	22	4.56	4.1	22.01
572	1828	18	28	0	0	457	316.648	286.412	150	15.6	24.89	9	30	1	7	20	4	31	4.97	4.64	22.11	93.9
573	1829	18	29	0	0	454	323.155	306.139	142	13	25.38	9	29	2	5	25	4	70	5.16	4.63	22.18	93.29
574	1830	18	30	0	0	452	329.662	325.898	129	10.5	5.16	6	20	2	2	23	4	52	5.24	4.96	22.01
575	1831	18	31	0	0	450	336.221	345.686	80	6	31.1	6	25	9	7	42	4	25	5.37	4.95	21.94	87.29
576	1832	18	32	0	0	449	343.574	365.496	63	4.4	0	6	26	1	2	59	4	51	5.31	5.31	21.98	92
577	1901	19	1	0	0	389	250.471	169.156	140	6.7	25.86	7	74	1	52	0	1		5.88	5.76	14.59	91.05
578	1902	19	2	0	0	386	252.068	155.295	136	6.7	59.78	4	97	2	5	4	3		5.78	4.49	14.89
579	1903	19	3	0	0	383	255.227	140.153	184	7	53.84	9	420	3	16	0	0		5.79	4.07	15.45	90.98
580	1904	19	4	0	0	381	259.891	123.214	210	8.6	10.32	5	66	0	6	9	1		5.89	3.87	16.26	93.77
581	1905	19	5	0	0	381	265.98	107.333	90	8.9	29.61	5	16	0	17	1	4		6.01	4.57	17.25	89.6
582	1906	19	6	0	0	381	273.401	92.4234	29	10.5	28.54	5	26	0	0	11	2		6.04	4.5	18.47
583	1907	19	7	0	0	383	275.515	77.5447	13	12.2	22.75	7	55	0	3	2	0		6.06	4.42	19.9	93.29
584	1908	19	8	0	0	385	267.35	63.0297	14	13.5	14.07	7	38	0	4	1	0		5.98	4.38	21.73
585	1909	19	9	0	0	389	259.728	48.5944	18	14.3	21.48	10	65	0	4	11	1		5.85	4.07	24.47	93.02
586	1910	19	10	0	0	393	252.745	31.3252	12	12.7	30.46	9	55	0	0	1	1	0	5.78	3.34	28.65
587	1911	19	11	0	0	399	246.774	12.7291	138	7.6	55.68	15	57	0	0	15	0	0	5.58	3.31	30.48	93.15
588	1912	19	12	0	0	404	241.829	5.86694	148	6.3	49.15	12	52	0	2	2	4		5.2	2.72	30.63
589	1913	19	13	0	0	410	237.98	23.0459	205	10.6	68.28	10	28	0	1	0	4	1	5.06	3.43	30.82	88.65
590	1914	19	14	0	0	417	235.771	38.6303	237	18.2	33.63	11	32	1	3	12	4	3	5.02	4.79	30.58	88.48
591	1915	19	15	0	0	425	235.248	54.8812	251	17.1	19.76	12	36	0	8	10	4	21	4.82	3.14	27.96
592	1916	19	16	0	0	434	236.421	71.9384	246	16.5	20.02	11	31	0	2	0	4	20	4.57	2.9	25.08	89.43
593	1917	19	17	0	0	443	239.266	88.9956	245	13.9	15.5	12	26	0	5	3	3	18	4.39	3.08	23.77	89.79
594	1918	19	18	0	0	453	243.725	106.053	265	14.3	7.99	10	32	0	5	4	4	6	4.33	2.54	23.57	93.5
595	1919	19	19	0	0	464	249.71	123.11	293	16.7	17.45	12	34	0	2	0	2	6	4.35	2.13	23.52
596	1920	19	20	0	0	475	256.754	140.261	284	14.1	21.49	8	22	0	0	0	2	9	4.5	2.96	24.57	91.07
597	1921	19	21	0	0	487	264.108	157.994	254	12.9	16.86	13	60	0	1	2	2	6	4.76	3.77	26.43	92.54
598	1922	19	22	0	0	499	272.643	176.213	255	13.5	36.96	13	45	0	1	4	3	6	4.99	3.32	29.62	89.44
599	1923	19	23	0	0	505	282.338	194.782	188	8.7	46.07	12	23	0	3	28	4	20	4.99	2.92	31.57
600	1924	19	24	0	0	498	293.08	213.609	137	6.5	66.28	10	86	0	1	3	4	0	4.96	3.79	30.71	88.65
601	1925	19	25	0	0	491	304.757	232.632	134	9.4	30.95	9	147	0	0	1	2	19	4.82	3.95	28.83
602	1926	19	26	0	0	486	317.266	251.807	159	13	25.76	11	68	0	2	7	3	49	4.57	4.02	26.6	92.74
603	1927	19	27	0	0	481	329.053	271.1	142	11	21.77	9	37	0	3	6	4	41	4.79	4.09	25.98	88.03
604	1928	19	28	0	0	477	335.56	290.49	146	12.9	32.79	8	29	1	3	27	3	27	5.31	3.42	26.04	90.24
605	1929	19	29	0	0	474	342.067	309.957	138	14.6	25.21	8	22	0	0	24	4	46	5.46	3.15	25.67
606	1930	19	30	0	0	471	348.574	329.488	130	13.7	21.14	9	16	2	1	27	4	46	5.23	4.06	24.62	92.88
607	1931	19	31	0	0	470	355.081	349.072	130	12.7	10.6	7	17	0	6	45	4	66	5.29	5.6	23.88
608	1932	19	32	0	0	469	362.051	368.7	126	9.5	18.95	6	33	0	1	61	4	32	5.2	6.04	23.82	88.89
609	2001	20	1	0	0	408	270.456	156.029	138	6.6	30.8	9	317	0	26	0	1		6.11	6.08	16.62
610	2002	20	2	0	0	406	271.935	140.881	125	5.3	53.84	6	185	0	3	2	2		5.99	5.35	17.1	93.36
611	2003	20	3	0	0	403	274.866	127.083	159	5.8	30.3	7	142	0	8	0	0		5.93	4.18	17.8	88.88
612	2004	20	4	0	0	401	279.202	112.919	221	9.8	39.19	7	69	0	14	14	1		5.97	3.92	18.77
613	2005	20	5	0	0	401	284.88	95.5414	255	11.3	25.49	7	22	0	10	10	2		6.04	4.71	19.99	90.02
614	2006	20	6	0	0	401	291.82	79.1631	200	12.6	31.19	4	19	0	0	11	2		6.02	4.54	21.54	92.88
615	2007	20	7	0	0	403	293.993	64.1797	43	15.4	26.15	6	81	0	0	0	1		5.99	4.28	23.48
616	2008	20	8	0	0	405	285.684	49.3009	16	15.5	30.06	9	93	0	1	2	0		5.93	4.19	25.91	92.88
617	2009	20	9	0	0	408	278.455	34.7517	21	12.7	40.37	7	194	0	1	8	0		5.78	3.99	29.26
618	2010	20	10	0	0	413	271.675	20.3163	60	8.3	46.62	10	207	0	2	1	0		5.62	3.39	33.57	96.31
619	2011	20	11	0	0	418	266.125	5.36793	128	4.4	33.46	9	111	5	0	0	0		5.45	3.47	35.05
620	2012	20	12	0	0	423	261.323	13.2281	160	8.3	62.24	13	43	1	6	2	3		5.19	3.28	34.62	93.29
621	2013	20	13	0	0	429	257.766	31.8242	221	15.5	55.22	12	42	2	1	1	4	38	5.07	3.51	33.79	89.43
622	2014	20	14	0	0	436	255.728	50.4202	228	17.1	18.34	15	52	0	0	29	2	0	4.99	4.1	32.36
623	2015	20	15	0	0	443	255.245	66.7497	249	13.4	17.88	13	35	1	1	4	2	15	4.84	3.39	29.51	93.22
624	2016	20	16	0	0	452	256.327	82.5275	247	13.8	15.51	11	38	0	3	1	2	17	4.65	3.2	26.65	90.11
625	2017	20	17	0	0	461	258.954	99.4384	242	12.8	14.12	13	36	0	0	0	2	40	4.48	3.22	25.17	88.64
626	2018	20	18	0	0	470	263.079	116.496	249	12.9	16.43	9	51	0	0	1	1	9	4.36	3.02	24.96
627	2019	20	19	0	0	481	268.633	133.553	296	14.5	10.13	10	42	0	0	0	1	9	4.33	2.89	25.3
628	2020	20	20	0	0	491	275.453	150.61	288	15.2	18.33	7	40	0	0	2	2	12	4.41	3.21	26.51	91.85
629	2021	20	21	0	0	503	282.586	167.667	267	14.6	14.94	11	45	0	0	2	2	2	4.61	3.57	28.63	92.61
630	2022	20	22	0	0	515	290.578	184.942	275	13.9	31.99	12	28	0	5	8	1	5	4.8	3.45	31.87	87.7
631	2023	20	23	0	0	523	299.694	202.712	266	12.3	15.32	11	34	0	2	16	3	10	4.84	3.4	34.46	90.11
632	2024	20	24	0	0	516	309.835	220.865	138	6.6	47.19	6	95	0	6	0	3	0	4.82	3.79	34.77	91.82
633	2025	20	25	0	0	510	320.903	239.312	115	5.8	54.69	6	198	0	0	1	2	4	4.77	3.96	33.6
634	2026	20	26	0	0	505	332.806	257.99	129	9.7	43.18	11	138	1	11	2	3	12	4.68	4.09	31.9
635	2027	20	27	0	0	500	345.457	276.854	125	9.8	29.84	9	47	0	9	42	4	24	4.89	4.21	31.17
636	2028	20	28	0	0	497	354.472	295.866	149	12.7	25.97	11	30	0	2	19	4	30	5.29	4.1	30.84	92.04
637	2029	20	29	0	0	494	360.979	315.001	132	10	34.45	8	26	0	0	24	4	38	5.41	4.14	30.05	92.19
638	2030	20	30	0	0	491	367.486	334.237	144	11.7	32.87	12	22	0	0	47	3	27	5.26	4.69	28.77
639	2031	20	31	0	0	490	373.993	353.558	156	12.3	31.56	6	21	0	0	39	4	21	5.2	5.42	27.81	92.61
640	2032	20	32	0	0	489	380.683	372.951	156	13.6	31.16	6	27	0	0	50	4	12	5.09	5.83	27.55	88.95
